# Supplementary material for: Channel architecture via self assembly of oxamideoximes complexes
Source: Royal Society of Chemistry journal article supplement (doi:10.1039/b707930c), 2007-10-19
Supplement: b707930c.pdf [file b707930c.pdf]

**Table S1** Selected bond lengths (Å) and angles (°) for nickel(II) complexes.

|           | <b>1aA</b> | <b>1aB</b> | <b>2a</b> | <b>3a</b> | <b>5a</b> |
|-----------|------------|------------|-----------|-----------|-----------|
| O1-N1     | 1.390(5)   | 1.387(5)   | 1.354(3)  | 1.358 (3) | 1.364(6)  |
| O2-N2     | 1.361(4)   | 1.378(4)   | 1.386(3)  | 1.389 (3) | 1.386(6)  |
| C1-N1     | 1.291(5)   | 1.292(6)   | 1.293(2)  | 1.298 (3) | 1.304(7)  |
| C2-N2     | 1.305(5)   | 1.305(5)   | 1.304(3)  | 1.294 (3) | 1.280(7)  |
| C1-N3     | 1.351(5)   | 1.357(5)   | 1.363(3)  | 1.361 (3) | 1.346(7)  |
| C2-N4     | 1.341(6)   | 1.346(5)   | 1.341(3)  | 1.346 (3) | 1.348(7)  |
| N3-C11    | 1.472(5)   | 1.480(7)   | 1.464(3)  | 1.436 (3) | 1.460(7)  |
| N4-C21    | 1.476(6)   | 1.464(6)   | 1.463(3)  | 1.473 (4) | 1.473(7)  |
| C1-C2     | 1.495(5)   | 1.501(5)   | 1.494(3)  | 1.487 (4) | 1.494(8)  |
| Ni -N1    | 1.857(4)   | 1.865(3)   | 1.877(2)  | 1.880 (2) | 1.867(5)  |
| Ni -N2    | 1.874(3)   | 1.866(4)   | 1.862(2)  | 1.862 (2) | 1.871(5)  |
| N1-Ni -N2 | 82.18(15)  | 81.59(15)  | 82.12(8)  | 81.66 (2) | 81.9(2)   |
| N1-Ni-N2# | 97.82(15)  | 98.41(15)  | 97.88(8)  | 98.34 (9) | 98.1(2)   |

**Table S2** Selected bond lengths (Å) and angles (°) for palladium(II) complexes.

|           | <b>1bA</b> | <b>1bB</b> | <b>1bC</b> | <b>2bA</b> | <b>2bB</b> | <b>2bC</b> | <b>3b</b> | <b>4b</b>  | <b>5b</b>  |
|-----------|------------|------------|------------|------------|------------|------------|-----------|------------|------------|
| O1-N1     | 1.394(5)   | 1.387(6)   | 1.373(5)   | 1.358(4)   | 1.397(4)   | 1.360(4)   | 1.392(8)  | 1.392(4)   | 1.396(6)   |
| O2-N2     | 1.366(4)   | 1.352(5)   | 1.350(6)   | 1.397(4)   | 1.342(4)   | 1.392(4)   | 1.342(6)  | 1.326(4)   | 1.326(5)   |
| C1-N1     | 1.284(6)   | 1.296(5)   | 1.291(7)   | 1.307(5)   | 1.303(4)   | 1.315(4)   | 1.296(9)  | 1.305(5)   | 1.300(7)   |
| C2-N2     | 1.295(5)   | 1.309(6)   | 1.314(7)   | 1.304(6)   | 1.310(5)   | 1.299(5)   | 1.309(8)  | 1.303(5)   | 1.296(6)   |
| C1-N3     | 1.334(7)   | 1.335(6)   | 1.333(7)   | 1.356(6)   | 1.335(5)   | 1.344(5)   | 1.341(8)  | 1.341(5)   | 1.340(7)   |
| C2-N4     | 1.350(7)   | 1.351(6)   | 1.354(7)   | 1.337(6)   | 1.380(4)   | 1.299(5)   | 1.361(9)  | 1.388(5)   | 1.400(7)   |
| N3-C11    | 1.438(9)   | 1.462(9)   | 1.464(7)   | 1.461(5)   | 1.469(5)   | 1.465(5)   | 1.448(12) | 1.471(5)   | 1.452(9)   |
| N4-C21    | 1.429(8)   | 1.417(10)  | 1.477(8)   | 1.460(5)   | 1.467(6)   | 1.472(6)   | 1.437(11) | 1.483(5)   | 1.472(7)   |
| C1-C2     | 1.494(7)   | 1.493(6)   | 1.497(6)   | 1.514(5)   | 1.503(5)   | 1.515(5)   | 1.489(9)  | 1.495(5)   | 1.493(8)   |
| Pd -N1    | 1.964(3)   | 1.958(4)   | 1.972(4)   | 1.970(3)   | 1.977(3)   | 1.977(3)   | 1.967(5)  | 1.980(3)   | 1.972(4)   |
| Pd-N2     | 1.972(3)   | 1.969(3)   | 1.970(4)   | 1.971(3)   | 1.972(3)   | 1.973(3)   | 1.974(5)  | 1.963(3)   | 1.974(4)   |
| N1-Pd-N2  | 78.65(14)  | 79.22(14)  | 79.16(17)  | 79.09(13)  | 79.64(13)  | 79.43(13)  | 79.2(2)   | 79.95(13)  | 79.81(17)  |
| N1-Pd-N2# | 101.35(14) | 100.78(14) | 100.84(17) | 100.91(13) | 100.36(13) | 100.58(13) | 100.8(2)  | 100.05(13) | 100.19(17) |

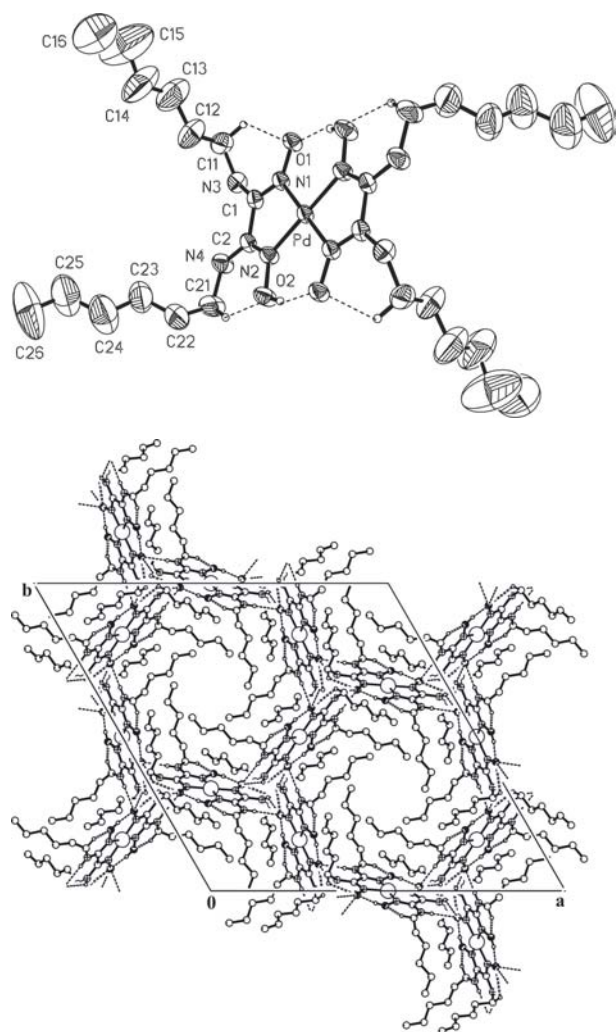

**Fig.S1** A). ORTEP drawing for **3b** with the atomic labeling and hydrogen bonds represented by dashed lines. Thermal ellipsoids are shown with the 30% probability level. B) View of the channels formation: translation related along *c* axis conformers of Pd(II) complexes are joined by N3...O2 (35) and N4...O2 (36) HB and due to the center of symmetry and translations they form the tubular channels along *c* direction filled by the alkyl chains.
